# Supplementary material for: Understanding the Social Context of the ASGM Sector in Ghana: A Qualitative Description of the Demographic, Health, and Nutritional Characteristics of a Small-Scale Gold Mining Community in Ghana
Source: MDPI journal article supplement (doi:10.3390/ijerph121012679), 2015-10-12
Supplement: s1 [file s1]

## Understanding the Social Context of the ASGM Sector in Ghana: A Qualitative Description of the Demographic, Health, and Nutritional Characteristics of a Small-Scale Gold Mining Community in Ghana

Rachel N. Long <sup>1</sup>, Elisha P. Renne <sup>2</sup> and Niladri Basu <sup>1,3,\*</sup>

**Table S1.** Percent distribution of educational attainment of the male and female household population in Kejetia according to our 2011 demographic survey.

| Background characteristic | No School | Nursery/Preschool | Completed Primary | Completed Middle/JHS | Completed Secondary/SHS, Tech, Voc | Higher than Secondary Education | Missing | Total | Number |
|---------------------------|-----------|-------------------|-------------------|----------------------|------------------------------------|---------------------------------|---------|-------|--------|
| <b>Female (Age)</b>       |           |                   |                   |                      |                                    |                                 |         |       |        |
| 6–9                       | 0.0       | 80.0              | 20.0              | 0.0                  | 0.0                                | 0.0                             | 0.0     | 100.0 | 5      |
| 10–14                     | 11.1      | 44.4              | 44.4              | 0.0                  | 0.0                                | 0.0                             | 0.0     | 99.9  | 9      |
| 15–19                     | 29.4      | 11.8              | 29.4              | 29.4                 | 0.0                                | 0.0                             | 0.0     | 100.0 | 17     |
| 20–24                     | 33.3      | 11.1              | 16.7              | 16.7                 | 16.7                               | 0.0                             | 5.6     | 100.1 | 18     |
| 25–29                     | 44.4      | 16.7              | 22.2              | 11.1                 | 0.0                                | 0.0                             | 5.6     | 100.0 | 18     |
| 30–34                     | 27.3      | 9.1               | 45.5              | 9.1                  | 0.0                                | 0.0                             | 9.1     | 100.1 | 10     |
| 35–39                     | 54.5      | 0.0               | 27.3              | 9.1                  | 9.1                                | 0.0                             | 0.0     | 100.0 | 11     |
| 40–44                     | 100.0     | 0.0               | 0.0               | 0.0                  | 0.0                                | 0.0                             | 0.0     | 100.0 | 3      |
| 45–49                     | 100.0     | 0.0               | 0.0               | 0.0                  | 0.0                                | 0.0                             | 0.0     | 100.0 | 4      |
| 50–54                     | 100.0     | 0.0               | 0.0               | 0.0                  | 0.0                                | 0.0                             | 0.0     | 100.0 | 1      |
| 55–59                     | 0.0       | 0.0               | 0.0               | 0.0                  | 0.0                                | 0.0                             | 0.0     | NA    | 0      |
| 60–64                     | 0.0       | 0.0               | 0.0               | 0.0                  | 0.0                                | 0.0                             | 0.0     | NA    | 0      |
| 65+                       | 100.0     | 0.0               | 0.0               | 0.0                  | 0.0                                | 0.0                             | 0.0     | 100.0 | 4      |
| <b>Total</b>              | 46.7      | 16.3              | 19.3              | 10.4                 | 3.7                                | 0.0                             | 3.7     | 100.1 | 135    |

Table S1. *Cont.*

| Background characteristic | No School | Nursery/Preschool | Completed Primary | Completed Middle/JHS | Completed Secondary/SHS, Tech, Voc | Higher than Secondary Education | Missing | Total | Number |
|---------------------------|-----------|-------------------|-------------------|----------------------|------------------------------------|---------------------------------|---------|-------|--------|
| <b>Male (Age)</b>         |           |                   |                   |                      |                                    |                                 |         |       |        |
| 6–9                       | 0.0       | 100.0             | 0.0               | 0.0                  | 0.0                                | 0.0                             | 0.0     | 100.0 | 8      |
| 10–14                     | 0.0       | 40.0              | 60.0              | 0.0                  | 0.0                                | 0.0                             | 0.0     | 100.0 | 5      |
| 15–19                     | 7.7       | 7.7               | 38.5              | 38.5                 | 0.0                                | 0.0                             | 7.7     | 100.1 | 13     |
| 20–24                     | 5.9       | 11.8              | 52.9              | 11.8                 | 11.8                               | 0.0                             | 5.9     | 100.1 | 16     |
| 25–29                     | 26.3      | 0.0               | 42.1              | 21.1                 | 10.5                               | 0.0                             | 0.0     | 100.0 | 18     |
| 30–34                     | 19.0      | 19.0              | 23.8              | 19.0                 | 14.3                               | 0.0                             | 4.8     | 99.9  | 21     |
| 35–39                     | 21.1      | 0.0               | 36.8              | 26.3                 | 0.0                                | 10.5                            | 5.3     | 100.0 | 19     |
| 40–44                     | 14.3      | 0.0               | 28.6              | 42.9                 | 14.3                               | 0.0                             | 0.0     | 100.1 | 7      |
| 45–49                     | 0.0       | 0.0               | 50.0              | 0.0                  | 50.0                               | 0.0                             | 0.0     | 100.0 | 2      |
| 50–54                     | 66.7      | 0.0               | 0.0               | 0.0                  | 0.0                                | 33.3                            | 0.0     | 100.0 | 3      |
| 55–59                     | 0.0       | 0.0               | 0.0               | 0.0                  | 0.0                                | 0.0                             | 0.0     | NA    | 0      |
| 60–64                     | 0.0       | 0.0               | 0.0               | 0.0                  | 0.0                                | 0.0                             | 100.0   | 100.0 | 1      |
| 65+                       | 0.0       | 0.0               | 0.0               | 0.0                  | 0.0                                | 0.0                             | 0.0     | NA    | 0      |
| <b>Total</b>              | 29.0      | 12.3              | 27.7              | 18.1                 | 6.5                                | 1.9                             | 4.5     | 100.0 | 155    |
